# Supplementary material
Source: PubMed Central journal article supplement (PMC9135795)
Supplement: mmc1.pdf [file mmc1.pdf]

**Cell, Volume 185**

**Supplemental information**

**Structure, receptor recognition, and antigenicity**

**of the human coronavirus**

**CCoV-HuPn-2018 spike glycoprotein**

**M. Alejandra Tortorici, Alexandra C. Walls, Anshu Joshi, Young-Jun Park, Rachel T. Eguia, Marcos C. Miranda, Elizabeth Kepl, Annie Dosey, Terry Stevens-Ayers, Michael J. Boeckh, Amalio Telenti, Antonio Lanzavecchia, Neil P. King, Davide Corti, Jesse D. Bloom, and David Veesler**

**Table S1.** CryoEM data collection and refinement statistics for CCoV-HuPn-2018 S with domain 0 in swung-out or proximal conformations. Related to Fig 1-2.

|                                        | S trimer<br>(swung out) | Domain 0<br>(swung out, local<br>refinement) | S trimer<br>(proximal) | Domain 0<br>(proximal, local<br>refinement) |
|----------------------------------------|-------------------------|----------------------------------------------|------------------------|---------------------------------------------|
| <b>Data collection and processing</b>  |                         |                                              |                        |                                             |
| Magnification (nominal)                | 130,000                 | 130,000                                      | 130,000                | 130,000                                     |
| Voltage (kV)                           | 300                     | 300                                          | 300                    | 300                                         |
| Electron exposure (e-/Å <sup>2</sup> ) | 84                      | 84                                           | 84                     | 84                                          |
| Defocus range (µm)                     | -0.8/-2.0               | -0.8/-2.0                                    | -0.8/-2.0              | -0.8/-2.0                                   |
| Pixel size (Å)                         | 0.8430                  | 0.8430                                       | 0.8430                 | 0.8430                                      |
| Symmetry imposed                       | C3                      | C1                                           | C3                     | C1                                          |
| Final particle images (no.)            | 70,990                  | 102,954                                      | 38,863                 | 36,141                                      |
| Map resolution (Å)                     | 2.8                     | 3.1                                          | 3.1                    | 3.8                                         |
| FSC threshold                          | 0.143                   | 0.143                                        | 0.143                  | 0.143                                       |
| <b>Validation</b>                      |                         |                                              |                        |                                             |
| MolProbity score                       | 1.39                    | 1.22                                         | 1.09                   | 1.21                                        |
| Clash score                            | 1.61                    | 1.97                                         | 1.57                   | 3.45                                        |
| <b>Ramachandran statistics</b>         |                         |                                              |                        |                                             |
| Favored (%)                            | 94.53                   | 96.21                                        | 96.85                  | 97.67                                       |
| Allowed (%)                            | 5.47                    | 3.50                                         | 2.77                   | 2.33                                        |
| Outliers (%)                           | 0                       | 0.29                                         | 0.39                   | 0                                           |
| PDB ID                                 | 7USA                    | 7USB                                         | 7US6                   | 7US9                                        |
| EMD ID                                 | 26730                   | 26731                                        | 26727                  | 26729                                       |

|                           |
|---------------------------|
| <b>N<sub>26</sub>YS</b>   |
| <b>N<sub>42</sub>YS</b>   |
| <b>N<sub>73</sub>NS</b>   |
| <b>N<sub>94</sub>IT</b>   |
| <b>N<sub>242</sub>GT</b>  |
| <b>N<sub>249</sub>CT</b>  |
| <b>N<sub>284</sub>SS</b>  |
| <b>N<sub>333</sub>NT</b>  |
| <b>N<sub>344</sub>FT</b>  |
| <b>N<sub>361</sub>TT</b>  |
| <b>N<sub>404</sub>GT</b>  |
| <b>N<sub>448</sub>LT</b>  |
| <b>N<sub>515</sub>KS</b>  |
| <b>N<sub>531</sub>IT</b>  |
| <b>N<sub>553</sub>IT</b>  |
| <b>N<sub>561</sub>NT</b>  |
| <b>N<sub>703</sub>ST</b>  |
| <b>N<sub>724</sub>VS</b>  |
| <b>N<sub>779</sub>YT</b>  |
| <b>N<sub>818</sub>VT</b>  |
| <b>N<sub>833</sub>VT</b>  |
| <b>N<sub>839</sub>FT</b>  |
| <b>N<sub>920</sub>ST</b>  |
| <b>N<sub>1073</sub>IT</b> |
| <b>N<sub>1199</sub>GT</b> |
| <b>N<sub>1293</sub>AT</b> |
| <b>N<sub>1310</sub>QT</b> |
| <b>N<sub>1323</sub>WT</b> |
| <b>N<sub>1335</sub>AT</b> |
| <b>N<sub>1340</sub>LT</b> |
| <b>N<sub>1357</sub>TT</b> |
| <b>N<sub>1370</sub>NT</b> |

**Table S2. N-Linked glycosylation sequons in CCoV-HuPn-2018.** Glycans observed in either of the CCoV-HuPn-2018 S cryoEM maps are in bold. Glycans positions highlighted with the same color are located within the same CCoV-HuPn-2018 S domain or subunit. Color code: domain 0 (dark blue), domain A (light blue), domain B (light green), domain C (dark green), domain D (yellow) and S<sub>2</sub> subunit (gray). Related to Fig 1-2.

**Table S3.** Biolayer interferometry binding kinetics analysis of feline, canine and porcine APNs or Fab 1AF10 to the HCoV-229E, CCoV-HuPN-2018 or TGEV B domain immobilized at the surface of SA biosensors. Related to Fig 4.

| <b>Proteins</b>                     | <b>K<sub>D, app</sub> (nM)</b> | <b>k<sub>on</sub> (M<sup>-1</sup>s<sup>-1</sup>)</b> | <b>k<sub>off</sub> (s<sup>-1</sup>)</b> |
|-------------------------------------|--------------------------------|------------------------------------------------------|-----------------------------------------|
| HCoV-229E Domain B human-APN        | 9.3                            | 6.6 x 10 <sup>4</sup>                                | 6.1 x 10 <sup>-4</sup>                  |
| CCoV-HuPn-2018 Domain B Feline-APN  | 27                             | 8 x 10 <sup>4</sup>                                  | 2.1 x 10 <sup>-3</sup>                  |
| CCoV-HuPn-2018 Domain B Canine-APN  | 1.0                            | 1.7 x 10 <sup>5</sup>                                | 1.8 x 10 <sup>-4</sup>                  |
| CCoV-HuPn-2018 Domain B Porcine-APN | 41                             | 3.5 x 10 <sup>4</sup>                                | 1.4 x 10 <sup>-3</sup>                  |
| CCoV-HuPn-2018 Domain B 1AF10       | 17                             | 1.0 x 10 <sup>5</sup>                                | 1.7 x 10 <sup>-3</sup>                  |
| TGEV Domain B Feline-APN            | 47                             | 5.7 x 10 <sup>4</sup>                                | 2.7 x 10 <sup>-3</sup>                  |
| TGEV Domain B Canine-APN            | 2.1                            | 1.3 x 10 <sup>5</sup>                                | 2.8 x 10 <sup>-4</sup>                  |
| TGEV Domain B Pig-APN               | 70                             | 3.8 x 10 <sup>4</sup>                                | 2.6 x 10 <sup>-3</sup>                  |
| TGEV Domain B 1AF10                 | 10                             | 1.5 x 10 <sup>5</sup>                                | 1.5 x 10 <sup>-3</sup>                  |

**Table S4.** X-ray crystallography data collection and refinement statistics. Related to Fig 4.

|                                   | <b>Canine APN-CCoV-HuPn-2018 B domain complex</b> |
|-----------------------------------|---------------------------------------------------|
| Space group                       | P 21221                                           |
| <i>Cell dimensions</i>            |                                                   |
| a, b, c (Å)                       | 101.43, 107.329, 239.229                          |
| $\alpha$ , $\beta$ , $\gamma$ (°) | 90, 90, 90                                        |
| Resolution range (Å)              | 48.96-3.3 (3.4-3.3)                               |
| CC1/2                             | 0.994 (0.525)                                     |
| Rmerge                            | 0.084 (0.667)                                     |
| $I/\sigma(I)$                     | 9.5 (1.6)                                         |
| Completeness (%)                  | 99.94 (100)                                       |
| Redundancy                        | 2 (2)                                             |
| <b>Refinement</b>                 |                                                   |
| No. reflections                   | 40,079                                            |
| Rwork/Rfree                       | 21.55/24.01                                       |
| <i>N° of atoms</i>                |                                                   |
| Protein                           | 8,876                                             |
| Water                             | 65                                                |
| B factor (Wilson plot)            | 68.79                                             |
| <i>R.m.s. deviations</i>          |                                                   |
| Bond lengths (Å)                  | 0.011                                             |
| Bond angles (°)                   | 1.49                                              |
| Ramachandran favored (%)          | 96.16                                             |
| Ramachandran allowed (%)          | 3.74                                              |
| Ramachandran outliers (%)         | 0.1                                               |
| PDB ID                            | 7U0L                                              |

- Data in parentheses are for the highest resolution shell

-  $R_{\text{merge}} = \frac{\sum(\sum |I_i - \langle I \rangle| / \sum I_i)}$ , where the first  $\sum$  is the sum over all reflections, and the second  $\sum$  is the sum over all measurements of a given reflection, with  $I_i$  being the  $i$ th measurement of the intensity of the reflection and  $\langle I \rangle$  the average intensity of that reflection.

-  $R_{\text{work}}/R_{\text{free}} = \sum(|F_o| - \langle |F_c| \rangle) / \sum |F_o|$ , where  $\langle |F_c| \rangle$  is the expectation of  $|F_c|$  under the probability model used to define the likelihood function. The sum is overall reflections.
