# Supplementary material
Source: PubMed Central journal article supplement (PMC9135795)
Supplement: mmc2.pdf [file mmc2.pdf]

| Protein Name                 | Sequence                                                                                                                                                                                                                                                                                                                                                                                                                                                                                                                                                                                                                                                                                                                                                                                                                                                                                                                                                                                                                                                                                                                                                                                                                                                                                                                                                                                                                                                                                                                                                                                                  |
|------------------------------|-----------------------------------------------------------------------------------------------------------------------------------------------------------------------------------------------------------------------------------------------------------------------------------------------------------------------------------------------------------------------------------------------------------------------------------------------------------------------------------------------------------------------------------------------------------------------------------------------------------------------------------------------------------------------------------------------------------------------------------------------------------------------------------------------------------------------------------------------------------------------------------------------------------------------------------------------------------------------------------------------------------------------------------------------------------------------------------------------------------------------------------------------------------------------------------------------------------------------------------------------------------------------------------------------------------------------------------------------------------------------------------------------------------------------------------------------------------------------------------------------------------------------------------------------------------------------------------------------------------|
| CCoV-HuPn-2018_S_2P_avi_his  | <p>MGILPSPGMPALLSLSVLLSLLMGCVAETGTDNPFCSKFLNRTIGNHWNLIENFLLNYSIRLPPNSDVVLGDYFPTVQPFWFCIRN<br/> NNNSLYVTMENLALYWDYATENITSDHRQRLHVVVKGPYSITVTTTRNFDAEAGAIICICKGSPPTTTGNDLNCNWSGDCRLNKH<br/> FPICPSNSQANCGNMLYGLQWFTDEVVAYLHGAIYRISFENKWFQVTLGDMRATTLQTAGALVDLWVFNFPYDVTYRNNKNGT<br/> IVSNCTDQCASVVDNVFTTQGGILPDSFNNWFLTNSSVTVSGKLVTRQPLVNVCLWVPSFKEAASFTFCFEGAGFDQCNGAVL<br/> NNTVDVIRFNLFNTADVQSGMGATVFSLNTTGGVILEISYNDIVSESSFYSGDIPFGITDGPYCYLYNGTTLKYLGLTLPSPVK<br/> EIAISKWGHFYINGYFFSTFPIDICISFNLTGASGAFWTIAYTSYTEALVQVENTAIKKVTCYNSHINNICKSQLTANLQNGFYFV<br/> ASSEVGLVNVKSVLLPSPFFAHTTNNITIDLGMKRSYGGQPIASPLSNITLPMQDNNTDVYCIKRSNQFYSIVHSTCKSSLWDNVFNQD<br/> CTDVLLEATAVIKTGTCPFSFDKLNHLTFNKFCLSLSPVGANCKFDVAARTRTNEQVRSLYVIEEGDNIVGVPDNSGLHDLVSL<br/> HLDSDCTDYNIGRTGVGVIQRTNSTLLSGLYYTSLSGDLLGFKNVSDGVIYSVTPCDVSAQAQAVIDGAIVGAMTSINSELLGLTHWT<br/> TTPNFYYSIYNYTNERTRGTAIDSNVDCEPIITYSNIGVCKNGALVINVTHSDGDVQPISTGNVTIPNTFTISVQVEYIQVYTT<br/> PVSIDCARYVCNGNPRCNKLLTQYVSACQTEIQALAMGARLENMEVDSMLFVSENALKLASVEAFNSTENLDPIYKEWPNIGGSWLG<br/> GLKIDILPSHNSKRKYRSAIEDLLFDKVVTSGLGTVDVDEYKRCCTGGYDIADLVCAQYNGIMVLPVAVANDDKMTMTASLAGGITLGA<br/> LGGGAVAIFFAVAVQARLNYVALQTDVNLKNQOILANAFNQAIGNITQAFGKVNDAIHQTSKGLATVAKVLAKVQDVVNTQGGQALSH<br/> LTVQLQNNFQAISSSIIDIYNRLDPPSADAQVDRITGRLTALNAFVSQTLTRQAEVRSRQLAKDKVNECVRSQSRFGFCGNGTH<br/> LFLSANAAPNGMIFFTVLLPTAYQTVTACSGICASDGDRTFGLVVKDVQLTLFRNLDDKFYLTPTMTYQPRATSSDFVQIEGCDV<br/> LFVNATEIDLPSIIPDYIDINQTVQDILENFRPNWTVPELTLDFNATYLNLTGEIDDLFRSEKLNHTTVLAILIDININNTLVNL<br/> EWLNRITVYKSGGYIPEAPRDQAVYVRKDEGWLLSTFLVPRGSGSGSGLNDIFEAQKIEWHEGSHHHHHHHH</p> |
| CCoV-HuPn-2018_S_Full-length | <p>MKLLFVVLVPLSIYDGNPFCSKFLNRTIGNHWNLIENFLLNYSIRLPPNSDVVLGDYFPTVQPFWFCIRNNSLYVTMENLALY<br/> WDYATENITSDHRQRLHVVVKGPYSITVTTTRNFDAEAGAIICICKGSPPTTTGNDLNCNWSGDCRLNKHFPICPSNSQANCGNML<br/> YGLQWFTDEVVAYLHGAIYRISFENKWFQVTLGDMRATTLQTAGALVDLWVFNFPYDVTYRNNKNGTIVSNCTDQCASVVDNV<br/> FTTQGGILPDSFNNWFLTNSSVTVSGKLVTRQPLVNVCLWVPSFKEAASFTFCFEGAGFDQCNGAVLNNTVDVIRFNLFNTADV<br/> VQSGMGATVFSLNTTGGVILEISYNDIVSESSFYSGDIPFGITDGPYCYLYNGTTLKYLGLTLPSPVK EIAISKWGHFYINGY<br/> FFSTFPIDICISFNLTGASGAFWTIAYTSYTEALVQVENTAIKKVTCYNSHINNICKSQLTANLQNGFYFVASSEVGLVNVKSVLLP<br/> SFFAHTTNNITIDLGMKRSYGGQPIASPLSNITLPMQDNNTDVYCIKRSNQFYSIVHSTCKSSLWDNVFNQDCTDVLLEATAVIKTGT<br/> PFSFDKLNHLTFNKFCLSLSPVGANCKFDVAARTRTNEQVRSLYVIEEGDNIVGVPDNSGLHDLVSLHLDSDCTDYNIGRTGV<br/> GVIRQNTNSTLLSGLYYTSLSGDLLGFKNVSDGVIYSVTPCDVSAQAQAVIDGAIVGAMTSINSELLGLTHWTTPNFYYSIYNYTNE<br/> RTRGTAIDSNVDCEPIITYSNIGVCKNGALVINVTHSDGDVQPISTGNVTIPNTFTISVQVEYIQVYTT PVSIDCARYVCNGNPR<br/> CNKLLTQYVSACQTEIQALAMGARLENMEVDSMLFVSENALKLASVEAFNSTENLDPIYKEWPNIGGSWLGGLKIDILPSHNSKRKYR<br/> SAIEDLLFDKVVTSGLGTVDVDEYKRCCTGGYDIADLVCAQYNGIMVLPVAVANDDKMTMTASLAGGITLGA LGGGAVAIFFAVAVQA<br/> RLNYVALQTDVNLKNQOILANAFNQAIGNITQAFGKVNDAIHQTSKGLATVAKVLAKVQDVVNTQGGQALSHLTVQLQNNFQAISSSI<br/> SDIYNRLDDELSADAQVDRITGRLTALNAFVSQTLTRQAEVRSRQLAKDKVNECVRSQSRFGFCGNGTHLFLSANAAPNGMIFFT<br/> TVLLPTAYQTVTACSGICASDGDRTFGLVVKDVQLTLFRNLDDKFYLTPTMTYQPRATSSDFVQIEGCDVLFVNATEIDLPSIIPD<br/> YIDINQTVQDILENFRPNWTVPELTLDFNATYLNLTGEIDDLFRSEKLNHTTVLAILIDININNTLVNL EWLNRITVYKVPWYV<br/> WLLIGLVVFCIPLLFCCCSTGCCGICGLGS</p>                                         |
| TGEV_S_Full-length           | <p>MKLLFVVLVPMPLIYDGNPFCSKFLNRTIGNHWNLIETFLNYSRLLPPNSDVVLGDYFPTVQPFWFCIRNDSNDLYVTLENLALY<br/> WDYATENITWNRQRLHVVVVNGYPYSITVTTTRNFDAEAGAIICICKGSPPTTTTSSSLTCNMGSECRINLKHFPICPSNSEANCGNML<br/> LYGLQWFADEVVAYLHGASIRISFENQWSGVTTLGDMRATTLVAGTLVDLWVFNFPYDVTYRNNKNGTIVSNCTDQCASVYAN<br/> VFTTQGGIFPDSFNNWFLTNSSVTVSGKLVTRQPLVNVCLWVPSFEEAASFTFCFEGAGFDQCNGAVLNNTVDVIRFNLFNTADV<br/> VQSGMGATVFSLNTTGGVILEISYNDIVSESSFYSGDIPFGITDGPYCYLYNGTTLKYLGLTLPSPVK EIAISKWGHFYINGY<br/> FFSTFPIDICISFNLTGASDVFWTIAYTSYTEALVQVENTAIKKVTCYNSHINNICKSQLTANLQNGFYFVASSEVGLVNVKSVLLP<br/> SFYTHITVNTIDLGMKRSYGGQPIASTLSNITLPMQDNNTDVYCIKRSNQFYSIVHSTCKSSLWDNIFRKNCTDVLATAVIKTGT<br/> PFSFDKLNHLTFNKFCLSLSPVGANCKFDVAARTRTNEQVRSLYVIEEGDNIVGVPDNSGLHDLVSLHLDSDCTDYNIGRTGV<br/> GIIQRTNSTLLSGLYYTSLSGDLLGFKNVSDGVIYSVTPCDVSAQAQAVIDGAIVGAMTSINSELLGLTHWTTPNFYYSIYNYTND<br/> RTRGTAIDSNVDCEPIITYSNIGVCKNGALVINVTHSDGDVQPISTGNVTIPNTFTISVQVEYIQVYTT PVSIDCARYVCNGNPR<br/> CNKLLTQYVSACQTEIQALAMGARLENMEVDSMLFVSENALKLASVEAFNSTENLDPIYKEWPNIGGSWLGGLKYILPSHNSKRKYR<br/> SAIEDLLFDKVVTSGLGTVDVDEYKRCCTGGYDIADLVCAQYNGIMVLPVAVANDDKMTMTASLAGGITLGA LGGGAVAIFFAVAVQA<br/> RLNYVALQTDVNLKNQOILASAFNQAIGNITQAFGKVNDAIHQTSRGLATVAKALAKVQDVVNTQGGQALSHLTVQLQNNFQAISSSI<br/> SDIYNRLDDELSADAQVDRITGRLTALNAFVSQTLTRQAEVRSRQLAKDKVNECVRSQSRFGFCGNGTHLFLSANAAPNGMIFFT<br/> TVLLPTAYETVTAMAGICASDGDRTFGLVVKDVQLTLFRNLDDKFYLTPTMTYQPRVATSSDFVQIEGCDVLFVNATEIDLPSIIPD<br/> YIDINQTVQDILENFRPNWTVPELTLDFNATYLNLTGEIDDLFRSEKLNHTTVLAILIDININNTLVNL EWLNRITVYKVPWYV<br/> WLLIGLVVIFCIPLLFCCCSTGCCGICGLSGSGSGSYPYDVPDYA</p>                        |
| HCoV-229E_S_Full-length      | <p>MFVLLVAYALLHIAGCQTNGLNYSYVNCVCGYSENVFAVESGGYIPSDFAFNWFLTNSSVVDVGVRSFQPLLLNCLWSVSG<br/> LRFTTGFVYFNGTGRGCKGFSDDVLDVIRYRNLFEEENLRRTILFKTSYGVVVFYCTNNTLVSGDAHIPFGTVLGNFYCFVNTTI<br/> GETTSAFVGLPKTVREFVIRSRGHFYINGRYFTLGNVEAVNFVTTAETDFFTVALASADVLVNVQSITANIICYNSVINR<br/> LRCDQLSFYVDPGFYSTPIQSVLEPVSIVSLPVYHKHMFIVLYVDFKPKQSGGKFCNCPAGVNIITLANFNETKGLCVDTSHFTT<br/> KYVAVYANVGRWSASINTGNCPSFGKVNNFVKGFSVCFSLKDI PGCCAMP IVANWAYSKYYITIGTLYVSWSDGDGITGVPPQVEGV<br/> SFMNVTLDKCKYNIYDVSGVGVIRVSNDFLNGITYTSTSGNLLGFKDVTKGTIYSITPCNPDPQLVYVQAVVGMAMSENFTSY<br/> GFSNVVLPKFFYASNGTYNCTDAVLTYSFGVCADGSI IAVQPRNVSYDSVAIVTANLSPISNWTISVQVEYLQITSTP VVDCS<br/> TYVNCNVRVCELKQYTSACKTIEDALRNSARLESADVSEMLT FDKKAFTLANVSSFGDYNSLSSVPSLPTSGSRVAGRS AIEDIL<br/> FSKIVTSGLGTVDADYKNTKGLSIADLACAQYNGIMVLPVAVADAEARMAMTGS LIGGIALGLLTSAVSIFPSLAIQARLNYVALQ<br/> TDVLQENQKILASFNKAMTNIVDAFTGVNDAITQTSQALQTVATLNIQDVVNVQNGNSLNHLTSQRQNFQAISSSIQAIYDRDL<br/> TIQADQVDRITGRLAALNVFSHTLTKYTEVRSRQLAQKVNCEVKSQSKRYGFCGNGTHIFSVNAAPEGLVFLVTLVLLPTQY<br/> KDVEAWSGLCVDTNGVLRQPNLALYKEGNYRITSRIMFEPRIPTMADVFQIENCNVTFVNI SRSELQITVPEYIDVNTKIQELS<br/> YKLPNYTVPDLVVEQYNTILNLTSEISTLENKSAELNYTVQKQLTIDININSTLVLDKWLNRVETYIKWPWWVWLCISVVLIFVVS<br/> MLLCCCSTGCCGFFSFCASSIRG</p>                                                                                                                                                                                                                                                                                                                                                   |

| Protein                     | Sequence                                                                                                                                                                                                                                                                                                                                                                                                                                                                                                                                                                                                                                                                                                                                                                                                                                                                                                                                                                                                                                                                                                                                                                                                                                                                                                                                                                                                                                                                                                                                                    |
|-----------------------------|-------------------------------------------------------------------------------------------------------------------------------------------------------------------------------------------------------------------------------------------------------------------------------------------------------------------------------------------------------------------------------------------------------------------------------------------------------------------------------------------------------------------------------------------------------------------------------------------------------------------------------------------------------------------------------------------------------------------------------------------------------------------------------------------------------------------------------------------------------------------------------------------------------------------------------------------------------------------------------------------------------------------------------------------------------------------------------------------------------------------------------------------------------------------------------------------------------------------------------------------------------------------------------------------------------------------------------------------------------------------------------------------------------------------------------------------------------------------------------------------------------------------------------------------------------------|
| HCoV-229E S_Full-length     | MKKLFVVLVVMPLIYGDNFPCSKLNTNRITGNHWNLIETFLNYSRRLPPNSDVVLGDYFPTVQPFWFCIRNDSNDLYVLTLENLKALY<br>WDYATENITWNHRQRLNVVNGYPYSITVTTTRNFNSAEGAIICICKGSPPTTTESSLTCNWGSECRNLNHFPICPNSSEANCGNM<br>LYGLQWFADEVVAYLHGASYSIFSEFNQWSTVTLGDMRATTELVAGTLDLWVFNVPYDVSYSYRVNKNKGTTVVSNCTDQCASVYAN<br>VFTTQPGGFIPSDFSFNWFLTNSSTLVSGKLVTKQPLLVNCLWPVPSFEEAATFCFEGAGFDQCNGAVLNNTVDVIRFNLNFTTN<br>VQSGKGATVFSLNTTGGVTLLEISCYDVTSDSSFFSYGEPFGVTDGPRYCYVLYNGTALKYLGTLPPSVKIEIAISKWGHFYINGYN<br>FFSTFPIDCISFNLTGDSVFWTIAIYTSYTEALVQVENTAITKVTYCNVSHVNNIKCSQLTANLNNGFYVPSSEVGLVKNKSVLLP<br>SFYTHITVNIITIDLGMKRSYGGQPIASTLSNITLPMQDNNTDVYICIRSDQFSVYVHSTCKSSLWDNI FKRNCITDVLDAVIKTGTC<br>PFSFDKLNLYLTFNKFCLSLSPVGANCKFDVAARTRTNEQVVRSLYVIEEGDNIVGVPDSDNGLHDLVSLHLDSDCTDYNIGRTGV<br>GIIRQNRNLTSLGLYTSLSGDLGFKNVSDGVISYVTPCDVSAQAVIDGTIVGAIITSINSELLGLTHWTTTNPFFYYYSIINYNTND<br>RTRGTAIDSDNDVCEPVIITYSNIGVCKNGAFVFINVTHSDGDVQPISTGNVTIPTNFTISVQVEYIQVYTPVSDCSRYVCNNGNPR<br>CNKLLTQVVSACQTEIQAALAMGARLENMEVDSMLFVSENALKLASVEAFNSSETLDPYKWEPNIGGSWLGGLKYILPSSHNSKRKYR<br>SAIEDLLFDKVVTSGLGTVDVDEYKRCCTGGYDIADLVCAQYYNGIMVLPVGVANADKMTMYTASLAGGITLALGGGGAVAI PFAVAVQA<br>RLNYVALQTDVNLKNQQILASAFNQAIGNITQSPGKVNDAIHQTSRGLATVAKALAKVQDVVNTQGGQALSHLTVLQNNFQAISSSI<br>SDIYNRLDELSADAQVDRILITGRALTALNAFVQTLTRQAEVRSRQLAKDKVNECVRSQSQRFGFCGNGTHLFLSANAAPNGMIFPH<br>TVLLPTAYETVTAWAGICASDGDRTFLVVKDQVTLFRNLDDKQFVLTPTMYQPRVATSSDFVQIEGCDVLFVNATVSDLPSTIPD<br>YIDINQTVQDILENFRPNWTVPELTFDIFNATYLNLTGEIDDLFRSEKLNHTTVELAILDINNTLVNLEWLNRIETYVVKWPWVY<br>WLLIGLVVIFCIPLLFFCCSTGCCGICGLSGSGSGSYYPDVPDYA |
| CCoV-HuPn-2018_RBD domain   | MGILPSPGMPALLSLVSLVLLMGCVAETGTSFFAHTTNIITIDLGMKRSYGGQPIASPLSNITLPMQDNNTDVYICIRSNQFSIYV<br>HSTCKSSLWDNVFNQDCTDLEATAVIKTGTCFSDKLNHLTFNKFCLSLSPVGANCKFDVAARTRTNEQVVRSLYVIEEGDNI<br>VGVPSDNGSSGGSLNDIFEAQKIEWHEGGSHHHHHHHH                                                                                                                                                                                                                                                                                                                                                                                                                                                                                                                                                                                                                                                                                                                                                                                                                                                                                                                                                                                                                                                                                                                                                                                                                                                                                                                                      |
| HCoV-229E RBD domain        | MGILPSPGMPALLSLVSLVLLMGCVAETGTLVPYHKHMFIVLYVDFKPSGGGKCFNCYPAGVNIITLANFNETKGPLCVDTSHT<br>TKYVAVYANVGRWSASINTGNCFFSFGKVNNEVFKGVSVCFLKDI PGGCAMP IVANWAYSKEYTIGTLVSVSDGDGITVGPQVVEG<br>GSSGGSLNDIFEAQKIEWHEGGSHHHHHHHH                                                                                                                                                                                                                                                                                                                                                                                                                                                                                                                                                                                                                                                                                                                                                                                                                                                                                                                                                                                                                                                                                                                                                                                                                                                                                                                                         |
| TGEV RBD domain             | MGILPSPGMPALLSLVSLVLLMGCVAETGTPSYFHTIIVNIITIDLGMKRSYGGQPIASTLSNITLPMQDNNTDVYICIRSDQFSVY<br>VHSTCKSSLWDNI FKRNCITDVLDAVIKTGTCFSDKLNHLTFNKFCLSLSPVGANCKFDVAARTRTNEQVVRSLYVIEEGDNI<br>IVLVPRGSSGGSLNDIFEAQKIEWHEGGSHHHHHHHH                                                                                                                                                                                                                                                                                                                                                                                                                                                                                                                                                                                                                                                                                                                                                                                                                                                                                                                                                                                                                                                                                                                                                                                                                                                                                                                                    |
| human APN_full-length       | MAKGFYISKSLGILGILGVAAVCTIIALSVMVYSQEKKNANSSPVASTTSPASATTPASATTLDQSKAWNRYRLPNTLKPDSYRV<br>TLRPYLTPNDRGLYVFKGSSVTRFTCKEATDVII IHSKKNLNTLSQGHVRLVLRGSGSQPPDDDKTELVEPEYLVVHLKGSVVKDS<br>QYEMDSEFEGELADLAGFYRSEYMEGNVRKVVATTQMQAADARKSFPFCDFEPAMKAEFNITLIHPKDLTALSNNMLPKGPSTPLPED<br>PNWNVTEFHHTPKMSTYLLAFIVSEFDYVEKQASNGVLIRIWARPSAIAAGHGDIYALNVTGPIINFFAGHYDTPYPLPKSDQIGLDP<br>FNAGAMENWGLVTYRENSLLFDPLSSSSSNKERVVTVIAHELAHQWFNGLVTEIWWNDLWLNNEGFASVYVEYLGADYAEPTWNLKDL<br>VLNDVYRMAVDALASSHPLSTPASEINTPAQISELFDPAISYSKSGASVLRMLSSFLSEDFVFKGLASVYHLYTFAQNTIYLNLDHDLQ<br>EAVNNRSIQLPPTTVRDIIMNRWTLQMGFPVITVDTSTGTLSEHFLDPPDSNVTRPSEFNVWVVPITSIIRDGRQQDYWLLDVRAQN<br>DLFSTSGNEWVLLNLTGYRVNYDEENWRKIQTQLQRDHSAPVINRAQIINDAFNLASAHKVPVTLALNNTLFLIEERQYMPWE<br>AALSSLSYFKLMFDRSEVYGPKNYLKQVTPLFIFRNNTNNWREIPENLMDQYSEVNAISTACSNVPECEEMVSGLFKQWMMENP<br>NNNPIHPNLRSTVYCNAIAQGEEEDFAWEQFRNATLVNEADKLRALACSKELWILNRYLSYTLNPDILIRKQDATSTIISI TNNV<br>IGQGLVWDFVQSNWKKLFNDYGGGSFSPSNLIQAVTRRFSTEYELQQLQEQFKKDNEETGFGSGTRALEQALEKTKANIKWVKENKEV<br>VLQWFTENSK                                                                                                                                                                                                                                                                                                                                                                                                                                                                                                             |
| human APN_full-length_R741G | MAKGFYISKSLGILGILGVAAVCTIIALSVMVYSQEKKNANSSPVASTTSPASATTPASATTLDQSKAWNRYRLPNTLKPDSYRV<br>TLRPYLTPNDRGLYVFKGSSVTRFTCKEATDVII IHSKKNLNTLSQGHVRLVLRGSGSQPPDDDKTELVEPEYLVVHLKGSVVKDS<br>QYEMDSEFEGELADLAGFYRSEYMEGNVRKVVATTQMQAADARKSFPFCDFEPAMKAEFNITLIHPKDLTALSNNMLPKGPSTPLPED<br>PNWNVTEFHHTPKMSTYLLAFIVSEFDYVEKQASNGVLIRIWARPSAIAAGHGDIYALNVTGPIINFFAGHYDTPYPLPKSDQIGLDP<br>FNAGAMENWGLVTYRENSLLFDPLSSSSSNKERVVTVIAHELAHQWFNGLVTEIWWNDLWLNNEGFASVYVEYLGADYAEPTWNLKDL<br>VLNDVYRMAVDALASSHPLSTPASEINTPAQISELFDPAISYSKSGASVLRMLSSFLSEDFVFKGLASVYHLYTFAQNTIYLNLDHDLQ<br>EAVNNRSIQLPPTTVRDIIMNRWTLQMGFPVITVDTSTGTLSEHFLDPPDSNVTRPSEFNVWVVPITSIIRDGRQQDYWLLDVRAQN<br>DLFSTSGNEWVLLNLTGYRVNYDEENWRKIQTQLQRDHSAPVINRAQIINDAFNLASAHKVPVTLALNNTLFLIEERQYMPWE<br>AALSSLSYFKLMFDRSEVYGPKNYLKQVTPLFIFRNNTNNWREIPENLMDQYSEVNAISTACSNVPECEEMVSGLFKQWMMENP<br>NNNPIHPNLRSTVYCNAIAQGEEEDFAWEQFRNATLVNEADKLRALACSKELWILNRYLSYTLNPDILIRKQDATSTIISI TNNV<br>IGQGLVWDFVQSNWKKLFNDYGGGSFSPSNLIQAVTRRFSTEYELQQLQEQFKKDNEETGFGSGTRALEQALEKTKANIKWVKENKEV<br>VLQWFTENSK                                                                                                                                                                                                                                                                                                                                                                                                                                                                                                             |
| canine APN_full-length      | MAKGFYISKSLGILGILGVAAVCTIIALSVMVYSQEKKNANSSPVASTTSPASATTPASATTLDQSKAWNRYRLPNTLKPDSYRV<br>TLRPYLTPNDRGLYVFKGSSVTRFTCKEATDVII IHSKKNLNTLSQGHVRLVLRGSGSQPPDDDKTELVEPEYLVVHLKGSVVKDS<br>QYEMDSEFEGELADLAGFYRSEYMEGNVRKVVATTQMQAADARKSFPFCDFEPAMKAEFNITLIHPKDLTALSNNMLPKGPSTPLPED<br>PNWNVTEFHHTPKMSTYLLAFIVSEFDYVEKQASNGVLIRIWARPSAIAAGHGDIYALNVTGPIINFFAGHYDTPYPLPKSDQIGLDP<br>FNAGAMENWGLVTYRENSLLFDPLSSSSSNKERVVTVIAHELAHQWFNGLVTEIWWNDLWLNNEGFASVYVEYLGADYAEPTWNLKDL<br>VLNDVYRMAVDALASSHPLSTPASEINTPAQISELFDPAISYSKSGASVLRMLSSFLSEDFVFKGLASVYHLYTFAQNTIYLNLDHDLQ<br>EAVNNRSIQLPPTTVRDIIMNRWTLQMGFPVITVDTSTGTLSEHFLDPPDSNVTRPSEFNVWVVPITSIIRDGRQQDYWLLDVRAQN<br>DLFSTSGNEWVLLNLTGYRVNYDEENWRKIQTQLQRDHSAPVINRAQIINDAFNLASAHKVPVTLALNNTLFLIEERQYMPWE<br>AALSSLSYFKLMFDRSEVYGPKNYLKQVTPLFIFRNNTNNWREIPENLMDQYSEVNAISTACSNVPECEEMVSGLFKQWMMENP<br>NNNPIHPNLRSTVYCNAIAQGEEEDFAWEQFRNATLVNEADKLRALACSKELWILNRYLSYTLNPDILIRKQDATSTIISI TNNV<br>IGQGLVWDFVQSNWKKLFNDYGGGSFSPSNLIQAVTRRFSTEYELQQLQEQFKKDNEETGFGSGTRALEQALEKTKANIKWVKENKEV<br>VLQWFTENSK                                                                                                                                                                                                                                                                                                                                                                                                                                                                                                             |

| Protein                      | Sequence                                                                                                                                                                                                                                                                                                                                                                                                                                                                                                                                                                                                                                                                                                                                                                                                                                                                                                                                                                                                                                                                                                                                                                                                                                                                                   |
|------------------------------|--------------------------------------------------------------------------------------------------------------------------------------------------------------------------------------------------------------------------------------------------------------------------------------------------------------------------------------------------------------------------------------------------------------------------------------------------------------------------------------------------------------------------------------------------------------------------------------------------------------------------------------------------------------------------------------------------------------------------------------------------------------------------------------------------------------------------------------------------------------------------------------------------------------------------------------------------------------------------------------------------------------------------------------------------------------------------------------------------------------------------------------------------------------------------------------------------------------------------------------------------------------------------------------------|
| canine APN_full-length_T749R | <p>MAKGFYISKALGILAIVLGIAAVSTIIALSVVYAQEKKNKNAESSPVSSPVSSPVSPVPTNPSTTAATTLAQSKPWNHYRLPKTLIPDSYNTLRP<br/> PSSYNTLRPYLTPNSNGLYTFRGSSVTRFTCKESTSMIIHSSKLNVTNIQQQRVALRGVGGSQAPADRTELVELTEYLVVHLKGLSQGHMYEME<br/> PLQVNSQYEMDSKFEGLADLAGFYRSEYTEMENGVKVLATTQMQAADARKSFPCFDEPAMKATFNITLIHFNPNLVALSNMLPRGSPVPGEDP<br/> VPFTEEPNWNVTEFETTPIMSTYLLAYIVSEFKNVQENTPSNVLIRIWARPSAMDQGHGNYALRVGTGPIIDFFSRHYDTPYPLNKSQ<br/> QIALPDFNAGAMENWGLVTVRESALLYDPOSSSSIGNKERVVTVIAHELAHQWFGNLVLEWNNDLWLNNEGFASYVEYLADYAEPTW<br/> NLKDLVLNEVYRVMADVALASSHPLSPASEVNTPAQISEVFDISIYSGKASVLRMLSNFLTEDLFKMGIASYLYHTYKQNTIYLNWHLQ<br/> LWNHLQWALGNQTAINTLPTVNAIMDRWLLQMGFPVITVDQTGTISQKHFLLDPSQSNVTRPSKFNLYLWIPIISSVKSGLQAHYWM<br/> PDNAKVQNDLFKTTGDEWVLLNLTGYLVNYDQNNWKKIHTQLQTDLSVIPVINRAQVIHDFDLASAQIVPVTLALNLTFLNLQ<br/> ETEYMPWEAALSSLSYFKLMFDRSEVYGPKNYLKQVTPLFNFHFEKITQNRWDHPQTLTEQYNEINAVSTACTYGVFKCKDLVSTL<br/> FAEWRKNPQNNPIYPNLRSTVYCNAAIQGGESEWVVEQFRNTSLVNEADKLRSAALACSTQVNI LNRYLSYTLNPEFIRKQVIST<br/> LSSIASNVIGQSLAWDFIQSNWKKLFEDYGTGSFNSLIQAVTRRFSTEFELQQLQEQFKANNMGTGFGSGTRALEQALEKTKANIK<br/> WVKENKEAVLQWFRENSQ</p>                                                                                                                                                                                  |
| feline APN_full-length       | <p>MAKGFYISKVPGILAILLGVAAVCTIIALSVVYSQEKNRSTESSTAASTAAPTGTPTTAVATLTDQSKPWNVYRLPKTLIPDSYNTLRP<br/> RPLYTPNNKGLYVFTGTNIVRFTCKESTNIVIIHSSKLNVTSHQGHMVALSGVGGFHPQVPIVIRTELVELTEYLVVHLKGLSQGHMYEME<br/> YEMNSEFQGEADLAGFYRSEYTEMENGVKVLATTTHMQATEARKSFPCFDEPAMKATFNITLIHFNPNLVALSNMLPRGSPVPGEDP<br/> TWKVTTEFETTPIMSTYLLAYIVSEFYSVETRAPSGVLRIRIWARPSAINQGHGDIYALVKTGPIIDFFSQHYDTPYPLNKSQDQIALPDF<br/> NAGAMENWGLVTVRESALLYDRQSSSSGNQERVVTVIAHELAHQWFGNLVLEWNNDLWLNNEGFASYVEYLADYAEPTWNLKDLV<br/> LNDVYRVMADVALASSHPLSTPASEINTPAQISEVFDISIYSGKASVLRMLSNFLTEDLFKMGIASYLYHTYKQNTIYLNWHLQ<br/> VVDKQPTIKLPDVTVAIMDRWLLQMGFPVITVDQTGTISQKHFLLDPSQSNVTRPSQFNLYLWVPIISSVKSGLQAHYWM<br/> NDLFKTTANDWVLLNLTGYLVNYDQNNWKKIHTQLQTDLSVIPVINRAQVIHDFDLASAQIVPVTLALNLTFLNIQETEYMPW<br/> QAALSSLSYFKLMFDRSEVYGPKNYLKQVTPLFNFHFEKITQNRWDHPQTLMDQYSEINAVSTACTYGVPECEKLAATLFAQWKKN<br/> PQNNPIHFNLRSTVYCNAAIQGGESEWVVEQFRNTSLVNEADKLRGALACSNQVWILNRFLSYTLNPNLIRKQVISTLSSISSN<br/> VVGQTLVWDFVQSNWKKLFQDYGTGSFNSLIQAVTRRFSTEFELQQLQEQFKANNMGTGFGSATRALEQALEKTKANIKWVKENK<br/> VLRWFTENS</p>                                                                                                                                                                                                                        |
| porcine APN_full-length      | <p>MAKGFYISKALGILGILGVAAVATIALSVVYAQEKKNKNAEHVQAPTSPTITTTAAITLTDQSKPWNRYRLPTLTPDSYNTLRP<br/> YLPNADGLYIFKGSIVRPIQCEPTDVIHSSKLNVTQGHMVLRVGVDSQVPEIDRTELVELTEYLVVHLKGLSQGHMYEME<br/> SEFQGEADLAGFYRSEYTEMENGVKVLATTQMQSTARKSFPCFDEPAMKATFNITLIHFNPNLVALSNMLPRGSPVPGEDP<br/> TEFETTPVMSTYLLAYIVSEFQSVNETAQNGVLRIRIWARPNAIAEGHGMALNVGTGPIIDFFANHYNTYPLPKSDQIALPDFNAGA<br/> MENWGLVTVRENALLDFDQSSSSISNKRERVVTVIAHELAHQWFGNLVLEWNNDLWLNNEGFASYVEYLADYAEPTWNLKDLVLPVGDV<br/> YRVMADVALASSHPLTTPAEVNTPAQISEMFDISIYSGKASVIRMLSNFLTGDLFKEGLASYLHAFAYLWVPIISSVKSGLQAHYWM<br/> QTSIRLPDVTVAIMDRWLLQMGFPVITVDTKGTISQKHFLLDSESNVTRSSAFDYLWVPIISSIKNGVMQDHYWLRDVSQAQNDLF<br/> KTASDDWVLLNVTGYFQVNYDEDNWRMIHQHLQTLNLSVIPVINRAQVIYDSFNLATAHMVPVTLALDNTLFLNGEYKEMPQAAAL<br/> SSLSYFKLMFDRSEVYGPKNYLKQVTEPLFQHFETLTKNWTERRPENLMDQYSEINAVSTACTYGVPECEKLAATLFAQWKKN<br/> PQNNPIHFNLRSTVYCNAAIQGGQDQWDFAWGQLQQAQLVNEADKLRSAALACSNVWLLNRYLYGTYLNPDLIRKQDATSTINSIASNVIGQ<br/> PLAWDFVQSNWKKLFQDYGTGSFNSLIQAVTRRFSTEFELQQLQEQFKANNMGTGFGSATRALEQALEKTKANIKWVKENKEVVLN<br/> WFIHS</p>                                                                                                                                                                                                                                |
| human APN_ectodomain_Fc      | <p>MGILPSPGMPALLSLVLSVLLMGCVAETGTDQSKAWNRYRLPNTLKPDSYRVTLRPLYLTPNDRGLYVFKGSSVTRFTCKEATDVI<br/> IIHSSKLNVTLSQGHRRVLRVGGVSPDIDKTELVEPTEYLVVHLKGLSVKDSQYEMDSEFEGELADLAGFYRSEYTEMENGVKVV<br/> ATTQMQAADARKSFPCFDEPAMKAEFNITLIHFKDLTALSNMLPKGPTPLPEDPNWVTEFHHTPKMSTYLLAFIVSEFDYVEKQA<br/> SNGVLRIRIWARPSAIAAGHDYALNVGTGPIILNFFAGHYDTPYPLPKSDQIGLPDFNAGAMENWGLVTVRENSLLDFDPLSSSSNKR<br/> VVTVIAHELAHQWFGNLVTEIWWNDLWLNNEGFASYVEYLADYAEPTWNLKDLVNDVYRVMADVALASSHPLSTPASEINTPAQI<br/> SELFDAISYSGKASVLRMLSSFLSEDFVFKQGLASYLHTFYAQNTIYLNLDWHLQEAVERNRSIQLPPTVTRDINMNRWTLQMGFPVITVD<br/> TSTGTLSEHFLDPSNVTRPSEFNWVWVPIITSIRDGRQQDYWLDVRAQNDLFTSGNEWVLLNLTGYRVNYDEENWRKI<br/> QTQLQRDHSIIPVINRAQIINDAFNLASAHKVPVTLALNLTFLIEERQYMPWEAALSSLSYFKLMFDRSEVYGPKNYLKQVTP<br/> FIHFRNNTNWRTEIPENLMDQYSEVNAI STACSNVPECEEMVSGLFKQWMPNPNPIHFNLRSTVYCNAAIQGGESEWDFAWEQ<br/> RNATLVNEADKLRALACSKELWILNRYLSYTLNPDLLRQDATSTIISITNNVIGQLVWDFVQSNWKKLFNDYGGGGSFNSLIQ<br/> AVTRRFSTEYELQQLQEQFKDNEETGFGSGTRALEQALEKTKANIKWVKENKEVVLQWFTENSKGGLVPRGSGSGSDPEPKSCDQ<br/> THTCCPCPAPELLGGPSVFLFPKPKDTLMI SRTEPVTCVVVDVSHEDPEVKFNWYVDGVEVHNAKTKPREQYNTSYRVVSVLTVL<br/> HQDWLNGKEYKCKVSNKALPAPIEKTISKAKGQPREPQVYTLPPSRDELTKNQVSLTCLVKGFYPSDIAVEWESNGQPENNYKTPP<br/> VLDSDGSEFFLYSKLTVDKSRWQQGNVFCSCVMHEALHNHYTQKSLSLSPGK</p> |
| human APN_ectodomain_R741T   | <p>MGILPSPGMPALLSLVLSVLLMGCVAETGTDQSKAWNRYRLPNTLKPDSYRVTLRPLYLTPNDRGLYVFKGSSVTRFTCKEATDVI<br/> IIHSSKLNVTLSQGHRRVLRVGGVSPDIDKTELVEPTEYLVVHLKGLSVKDSQYEMDSEFEGELADLAGFYRSEYTEMENGVKVV<br/> ATTQMQAADARKSFPCFDEPAMKAEFNITLIHFKDLTALSNMLPKGPTPLPEDPNWVTEFHHTPKMSTYLLAFIVSEFDYVEKQA<br/> SNGVLRIRIWARPSAIAAGHDYALNVGTGPIILNFFAGHYDTPYPLPKSDQIGLPDFNAGAMENWGLVTVRENSLLDFDPLSSSSNKR<br/> VVTVIAHELAHQWFGNLVTEIWWNDLWLNNEGFASYVEYLADYAEPTWNLKDLVNDVYRVMADVALASSHPLSTPASEINTPAQI<br/> SELFDAISYSGKASVLRMLSSFLSEDFVFKQGLASYLHTFYAQNTIYLNLDWHLQEAVERNRSIQLPPTVTRDINMNRWTLQMGFPVITVD<br/> TSTGTLSEHFLDPSNVTRPSEFNWVWVPIITSIRDGRQQDYWLDVRAQNDLFTSGNEWVLLNLTGYRVNYDEENWRKI<br/> QTQLQRDHSIIPVINRAQIINDAFNLASAHKVPVTLALNLTFLIEERQYMPWEAALSSLSYFKLMFDRSEVYGPKNYLKQVTP<br/> FIHFRNNTNWRTEIPENLMDQYSEVNAI STACSNVPECEEMVSGLFKQWMPNPNPIHFNLRSTVYCNAAIQGGESEWDFAWEQ<br/> RNATLVNEADKLRALACSKELWILNRYLSYTLNPDLLRQDATSTIISITNNVIGQLVWDFVQSNWKKLFNDYGGGGSFNSLIQ<br/> AVTRRFSTEYELQQLQEQFKDNEETGFGSGTRALEQALEKTKANIKWVKENKEVVLQWFTENSKGGLVPRGSGSGSDPEPKSCDQ<br/> THTCCPCPAPELLGGPSVFLFPKPKDTLMI SRTEPVTCVVVDVSHEDPEVKFNWYVDGVEVHNAKTKPREQYNTSYRVVSVLTVL<br/> HQDWLNGKEYKCKVSNKALPAPIEKTISKAKGQPREPQVYTLPPSRDELTKNQVSLTCLVKGFYPSDIAVEWESNGQPENNYKTPP<br/> VLDSDGSEFFLYSKLTVDKSRWQQGNVFCSCVMHEALHNHYTQKSLSLSPG</p>  |

| Protein                        | Sequence                                                                                                                                                                                                                                                                                                                                                                                                                                                                                                                                                                                                                                                                                                                                                                                                                                                                                                                                                                                                                                                                                                                                                                                                                                                                                                           |
|--------------------------------|--------------------------------------------------------------------------------------------------------------------------------------------------------------------------------------------------------------------------------------------------------------------------------------------------------------------------------------------------------------------------------------------------------------------------------------------------------------------------------------------------------------------------------------------------------------------------------------------------------------------------------------------------------------------------------------------------------------------------------------------------------------------------------------------------------------------------------------------------------------------------------------------------------------------------------------------------------------------------------------------------------------------------------------------------------------------------------------------------------------------------------------------------------------------------------------------------------------------------------------------------------------------------------------------------------------------|
| canine APN_ectodomain_Fc       | <p>MGILPSPGMPALLSLVLSVLLMGCVAETGTQAQSKPWNHYRLPKTLIPSSYNVTLRPLYLTPNSNGLYTFKGSSTVRFCTCKESTSMI<br/> IIHKKLNVTNIQGRVALRGVGGSSQAPAI DRTELVEVTEYLVVHLREPLQVNSQYEMDSKFEGELADDLAGFYRSEYTEENGVKVLA<br/> ATTQMQAADARKSFPFCFDEPAMKATFNITLIHPSNLVALSNMLPRGSPVPTTEEPNWNVTEFETTPIMSTYLLAYIVSEFKNVQENT<br/> PSNVLIRIWARPSAMDQGHGNYALRVTPILDFFSRHYDTPYPLNKSDQIALPDFNAGAMENWGLVTVYRESALLYDPQSSSIGNKER<br/> VVTVIAHELAHQWFGNLTLEWVNDLWLNNEGFASYVEYLADYAEPTWNLKDLIVLNEVYRVMADALASSHPLSSPASEVNTPAQI<br/> SEVFDSSISYKSGASVLRMLSSFLTEDLFKKGAVASYLHTFAYQNTIYLDLWNLHQLWALGNQTAINLPYTVNAIMDRWLLQMGFPVVTV<br/> DTTGTLSQKHFLLDPQSNVTRPSKFNWLIPISSVKSQTQAQHYWMPDNKAVQNDLFRKTTGDEWVLLNLTGYYLVNYDQNNWK<br/> KIHTQLQTDLSVIPVINAQVIHDTFLASAQIVPVTALNNTLFLNQETEYMPWEAALSLSYFKLMFDRSEVYGPMMKNYLRKQVT<br/> PLFNHFKEITQNWTDHPQTLTEQYNEINAVSTACTYGVPKCKDLVSTLFAEWRKNPQNNPIYPNLRSTVYCNIAIQGGEEWNVFWE<br/> QFRNTSLVNEADKLRSLACSTQVWILNRYLSYTLNPEFIRKQDVI STLSSIASNVIGQSLAWDFIQSNWKKLFEDYGTGFSFNSL<br/> IQAVTRRFSTEFELQQLQEQFKANNMDFGSGSTRALEQALEKTKANIKWVKENKEAVLQWFRENSQGGSLVPRGSGSGSDPEPKSC<br/> DKTHTCPPCPAPELLGGPSVFLFPPPKPDTLMI SRTPEVTCVVVDVSHEDPEVKFNWYVDGVEVHNAKTKPREEQYNSTYRVVSVLT<br/> VLHQDWLNGKEYKCKVSNKALPAPIEKTISKAKGQPREPQVYTLPPSRDELTKNQVSLTCLVKGFYPSDIAVEWESNGQPENNYKTT<br/> PPVLDSDGSEFFLYSKLTVDKSRWQQGVNFSCVMHEALHNNHYTQKLSLSLSPGK</p> |
| canine APN_ectodomain_T749R_Fc | <p>MGILPSPGMPALLSLVLSVLLMGCVAETGTQAQSKPWNHYRLPKTLIPSSYNVTLRPLYLTPNSNGLYTFKGSSTVRFCTCKESTSMI<br/> IIHKKLNVTNIQGRVALRGVGGSSQAPAI DRTELVEVTEYLVVHLREPLQVNSQYEMDSKFEGELADDLAGFYRSEYTEENGVKVLA<br/> ATTQMQAADARKSFPFCFDEPAMKATFNITLIHPSNLVALSNMLPRGSPVPTTEEPNWNVTEFETTPIMSTYLLAYIVSEFKNVQENT<br/> PSNVLIRIWARPSAMDQGHGNYALRVTPILDFFSRHYDTPYPLNKSDQIALPDFNAGAMENWGLVTVYRESALLYDPQSSSIGNKER<br/> VVTVIAHELAHQWFGNLTLEWVNDLWLNNEGFASYVEYLADYAEPTWNLKDLIVLNEVYRVMADALASSHPLSSPASEVNTPAQI<br/> SEVFDSSISYKSGASVLRMLSSFLTEDLFKKGAVASYLHTFAYQNTIYLDLWNLHQLWALGNQTAINLPYTVNAIMDRWLLQMGFPVVTV<br/> DTTGTLSQKHFLLDPQSNVTRPSKFNWLIPISSVKSQTQAQHYWMPDNKAVQNDLFRKTTGDEWVLLNLTGYYLVNYDQNNWK<br/> KIHTQLQTDLSVIPVINAQVIHDTFLASAQIVPVTALNNTLFLNQETEYMPWEAALSLSYFKLMFDRSEVYGPMMKNYLRKQVT<br/> PLFNHFKEITQNWTDHPQTLTEQYNEINAVSTACTYGVPKCKDLVSTLFAEWRKNPQNNPIYPNLRSTVYCNIAIQGGEEWNVFWE<br/> QFRNTSLVNEADKLRSLACSTQVWILNRYLSYTLNPEFIRKQDVI STLSSIASNVIGQSLAWDFIQSNWKKLFEDYGTGFSFNSL<br/> IQAVTRRFSTEFELQQLQEQFKANNMDFGSGSTRALEQALEKTKANIKWVKENKEAVLQWFRENSQGGSLVPRGSGSGSDPEPKSC<br/> DKTHTCPPCPAPELLGGPSVFLFPPPKPDTLMI SRTPEVTCVVVDVSHEDPEVKFNWYVDGVEVHNAKTKPREEQYNSTYRVVSVLT<br/> VLHQDWLNGKEYKCKVSNKALPAPIEKTISKAKGQPREPQVYTLPPSRDELTKNQVSLTCLVKGFYPSDIAVEWESNGQPENNYKTT<br/> PPVLDSDGSEFFLYSKLTVDKSRWQQGVNFSCVMHEALHNNHYTQKLSLSLSPGK</p> |
| feline APN_ectodomain_FC       | <p>MGILPSPGMPALLSLVLSVLLMGCVAETGTQDQSKPWNHYRLPKTLIPDSYNVTLRPLYLTPNNKGLYVFTGTNIVRFCTCKESTNIV<br/> IIHKKLNVTSHQGHMVALSGVGGFHPQVIVRTELVELTEYLVVHLQEPVAGRQYEMNSEFQGLADDLAGFYRSEYMEENGVKVLA<br/> LATHMQATEARKSFPFCFDEPAMKATFNITLIHPSNLVALSNMLPRGSPVPTTEEPNWNVTEFETTPIMSTYLLAYIVSEFYSVETR<br/> APSGVLRIRIWARPSAINQGHGDAYLKVTPGILDFFSQHYDTPYPLNKSDQIALPDFNAGAMENWGLVTVYRESALLYDRQSSSSGNQE<br/> RVVTVIAHELAHQWFGNLTLEWVNDLWLNNEGFASYVEYLADYAEPTWNLKDLMLNDVYRVMADALASSHPLSSPASEVNTPAQI<br/> SEVFDSSISYKSGASVLRMLSSFLTEDLFKKGAVASYLHTYKYGNTIYLNLEWHLQVVDVQYTIKLPDLVYSAIMDRWLLQMGFPVVT<br/> VDTQTGTSIQHFLDLPQSNVTRPSQFNWLIWVPISSVRSQSAQHYWLPVGEKAQNDLFRKTTANWVLLNLTGYYLVNYDQNNWK<br/> KKIQTQLQTDLSVIPVINAQVIHDAFNLSAQKVPVTALNNTLFLIQETEYMPWQAALSLSYFKLMFDRSEVYGPMMKNYLRKQVT<br/> PLFNHFERVTKNWDHPQTLMDQYSEINAVSTACTYGVPECEKLAATLFAQWKKNPQNNPIHFNLRSTVYCNIAIQGGEEWNVFWE<br/> EQFLKAEVLNEADKLRGALACSNQVWILNRYLSYTLNPEFIRKQDVI STLSSIASNVVGTQVWVQVNSNKKLFDYGTGFSFNSL<br/> LIQAVTRRFSTEFELQQLQEQFKANNMDFGSGSTRALEQALEKTKANIKWVKENKEAVLQWFRENSQGGSLVPRGSGSGSDPEPKSC<br/> DKTHTCPPCPAPELLGGPSVFLFPPPKPDTLMI SRTPEVTCVVVDVSHEDPEVKFNWYVDGVEVHNAKTKPREEQYNSTYRVVSVLT<br/> VLHQDWLNGKEYKCKVSNKALPAPIEKTISKAKGQPREPQVYTLPPSRDELTKNQVSLTCLVKGFYPSDIAVEWESNGQPENNYKTT<br/> PPVLDSDGSEFFLYSKLTVDKSRWQQGVNFSCVMHEALHNNHYTQKLSLSLSPGK</p>    |
| porcine APN_ectodomain_Fc      | <p>MGILPSPGMPALLSLVLSVLLMGCVAETGTQDQSKPWNHYRLPPTLLPDSYNVTLRPLYLTPNADGLYIFKGSIVRFICQEPDVI<br/> IIHKKLNVTYTGQHMVLRGVGDSQVPEIDRTELVELTEYLVVHLKGLQPGHMYEMESEFQGLADDLAGFYRSEYMEENGVKVLA<br/> TTQMSTADARKSFPFCFDEPAMKATFNITLIHPSNLVALSNMLPRGSPVPTTEEPNWNVTEFETTPVMSTYLLAYIVSEFQSVNETAQ<br/> NGVLRIRIWARPNIAEAGHMYALNVTGPIILNFFANHYNTPYPLPKSDQIALPDFNAGAMENWGLVTVYRENALLFPDQSSSISNKERV<br/> VTVIAHELAHQWFGNLTLEWVNDLWLNNEGFASYVEYLADYAEPTWNLKDLIVPQDVIYRVMADALASSHPLSSPASEVNTPAQI<br/> EMFDSISYKSGASVLRMLSSFLTEDLFKKGAVASYLHTFAYQNTIYLDLWHLQKAVDAQTSIRLPDPTVRAIMDRWLLQMGFPVITVD<br/> TKTGNISQKHFLLDSESNVTRSSAFDYLWVPISSIKNGVMQDHYWLRDVSQAQNDLFRKTTASDDWVLLNVTGTFQVNYDEDNWRM<br/> IQHQLQTNLSVIPVINAQVIYDSFNLA TAHMVPVTLALDNTLFLNKEKEYPWQAALSLSYFSLMFDRESEVYGPMMKNYLRKQVEP<br/> LFQHFETLTKNWTTERPENLMDQYSEINAI STACSNGLPQCENLAKTLFDQWMSDPENNPIHFNLRSTIYCNIAIQGGQDQWFAWQ<br/> LQQAQLVNEADKLRSLACSNVWLLNRYLYGTYLNPDLIRKQDATSTINSIASNVIGQPLAWDFVQSNWKKLFDYGTGFSFNSL<br/> QGVTRRFSEFELQQLQEQFKANNMDFGSGSTRALEQALEKTKANIKWVKENKEAVLQWFRENSQGGSLVPRGSGSGSDPEPKSCDK<br/> THTCPPCPAPELLGGPSVFLFPPPKPDTLMI SRTPEVTCVVVDVSHEDPEVKFNWYVDGVEVHNAKTKPREEQYNSTYRVVSVLT<br/> VLHQDWLNGKEYKCKVSNKALPAPIEKTISKAKGQPREPQVYTLPPSRDELTKNQVSLTCLVKGFYPSDIAVEWESNGQPENNYKTT<br/> PPVLDSDGSEFFLYSKLTVDKSRWQQGVNFSCVMHEALHNNHYTQKLSLSLSPGK</p>      |
| CCoV-HuP_0_domain_I53-50A      | <p>MGILPSPGMPALLSLVLSVLLMGCVAETGTDFNPKSKFLNRTIGNHWNLIENFLNYSIRLPPNSDVVLGDYFPTVQPFWCINR<br/> NNNSLYVTMENKALYWDYATENITSDHRQRHLVVVKGKPYSTVTTTRNFDAEAGAIICICKGSPTTTTGNLDCNWSGDCRLNKH<br/> FPICPSNSQANCGNMLYGLQWFTDEVVAYLHGAIYRISFENKWFQVTLTGMRAATLQTAGALVDLWVFNVYDVTYRNNKNGT<br/> IVSNCTDQCASVVDGSGSGSGSGSGSGSSEKAAKAEAAARKMEELFKKHKIVAVLRANSVEAIEKAVAVFAGGVHLIEITFTVPD<br/> ADTVIKALSVLKEGAIIGAGTSTVVEQARKAVESGAEIFVSPHLDEEISQFAKEKGVFYFMPGMVMTPELVKAMKLGHTLKLFPGE<br/> VVGQPVKAMKPEFPNVKVFVPTGGVNDLVAEWFKAGVLA VGVGSAVVKGTDFEVRKAKAFVEKIRGTEGGSHHHHHHHH</p>                                                                                                                                                                                                                                                                                                                                                                                                                                                                                                                                                                                                                                                                                                                                                          |

| Protein                   | Sequence                                                                                                                                                                                                                                                                                                                                                                                                                                                                                                                                                                                                                                                                                                                                                                                                                                                                                                                                                                                                                                                                                                                                                                                                                                                                                                                                                                                                                                                                                                                                                                                                                                                                 |
|---------------------------|--------------------------------------------------------------------------------------------------------------------------------------------------------------------------------------------------------------------------------------------------------------------------------------------------------------------------------------------------------------------------------------------------------------------------------------------------------------------------------------------------------------------------------------------------------------------------------------------------------------------------------------------------------------------------------------------------------------------------------------------------------------------------------------------------------------------------------------------------------------------------------------------------------------------------------------------------------------------------------------------------------------------------------------------------------------------------------------------------------------------------------------------------------------------------------------------------------------------------------------------------------------------------------------------------------------------------------------------------------------------------------------------------------------------------------------------------------------------------------------------------------------------------------------------------------------------------------------------------------------------------------------------------------------------------|
| CCoV-HuP_B_domain_I53-50A | MGILPSPGMPALLSLVSLVLLMGCVAETGTGTSFFAHTTVNITIDLGMKRSYGGQPIASPLSNITLPMQDNNTDVYICIRSNQFSIYV<br>HSTCKSSLWDNVFNQDCTDVLEATAVIKTGTCPFSFDKLNHLTFNKFCLSLSPVGANCKFDVAARTRTNEQVRSYLYIYEEGDNI<br>VGVPSDNGSGSGSGSGSGSGSEKAAKAEAAARKMEELFKKHKIVAVLRANSVEEAIEKAVAVFAGGVHLIEITFTVPDADTVIKA<br>LSVLKEKGAIIAGTIVTSVEQARKAVESGAEIFVSPHLDEEISQFAKEKGVFMPGVMTPTLTKKAMKLGHTILKLPFGEVVGQFV<br>KAMKGFPPNVKFPVPTGVNLDNVAENFKAGVLAAGVGSALVKGTPDEVREKAKAFVEKIRGATEGGSHHHHHHHH                                                                                                                                                                                                                                                                                                                                                                                                                                                                                                                                                                                                                                                                                                                                                                                                                                                                                                                                                                                                                                                                                                                                                                                                                       |
| HKU1_S_I53-50A            | MGILPSPGMPALLSLVSLVLLMGCVAETGTGTVIGDFNCTNSPINDYNKTI PRISEDDVVDVSLGLGTYVYVLRVYVNTLLFTGYFP<br>KSGANFRDLALGKSIYLLSTLWYKPPFLSDFNNGIFSKVKNTKLYVNNNTLYSEFSTIVIGSVFVNTSYTIVVQPHNGILEITACQYTM<br>CEYPHTVCKSKGIRNESWHIDSEPLCLFKKNFTYNVADWLYPHFYQERGVFYAYYADVGMPTTFLFSLYLGITLILSHYVVMPLTC<br>NAISSNTDNETLEYVWTPLSRRQYLLNFDEHGVITNAVDCSSFLSEIQCKTQSFAPNTGVYDLSGFTVKPVATVYRRIINLPDCCI<br>DNWLNNSVPSPLNWERRIFSNCFNLSLTLRLVHVDSFCNNLDKSKIFGSCFNSITVDFKFAIPNRRRDLQLGSSGFLQSSNYKI<br>DISSSSCQLYISLPLNVNNTINNFPNPSNRRYGFSGFNLSSYDVVYSDHCFVSNDFPCADPSVNSCAKSKPPSAICPAGTKYRH<br>CDLDTTLYVKNWCRCSCLPDPFISTYSPNTPCQKQKVVVIGIEHCPGLGINEEKCQTQNLNHSFCFSPDAFLGWSFDSCISNNRCNIFS<br>NFIFNGINSGTCSNDLLYNTIEISTGVCVNYDLYGITGGGIFKEVSAAYNNWQNLLYDSNGNIGFKDFLTNKTYYTILPCYSGRV<br>SAAFYQNSSPALYRNKCSYVLNNSIFISQPFYFDSYLGCVLNAVNLTSYVSSCDLRMGSGFCIDYALPSSGGSGSGISSPYRF<br>VTFEPFNVSFVNDVETVGLFEIQTIPNTFTAGHEEFIQTSSEPKVTIDCSAFVCSNYAACHDLLSEYGTFCNDINSILNEVDNLDL<br>ITQLQVANALMQGVTLSSNLTNLHSDVDNIDFKSLLGCLGSGCQSSRSLELLEDFLNKVKLSDVGFVEAYNNTGGSEIRDLCCVQ<br>SFNGIKVLPPIISETQISGYTTAATAAMFPWSAAAGVPPFSLNVQYRINGLGVTMDVLNKNQKLIANAFNKALLSIQNGFTATNSA<br>LAKIQSVNANAQALNSLLQLEFNKFGAIISSSQEILSRDPPPEAQVQIDRLINGRLTALNAVYSQQLSDITLIKAGASRAIEKVN<br>CVKSQSPRINFCGNHLLSLVQNAFYGLLFIHFSYKFTSFKTVLVSPLGLCSGDRGIAPKQGYFVQSDMSWMTFGSSYYYPEPISD<br>KNVVFMSCSVNFTKAPFIYLNNSIPNLSDFEAELSLWFKNHTSIAPNLTFNHSHINATFLDLYEMNVIQESIKSLNGSGYIPEAPR<br>DGQAYVRKDGWVLLSTFLGSGSGSGSGSEKAAKAEAAARKMEELFKKHKIVAVLRANSVEEAIEKAVAVFAGGVHLIEITFTVP<br>DADTVIKALSVLKEKGAIIAGTIVTSVEQARKAVESGAEIFVSPHLDEEISQFAKEKGVFMPGVMTPTLTKKAMKLGHTILKLPFG<br>EVVGPQFVKAMKGFPPNVKFPVPTGVNLDNVAEWFKAGVLAAGVGSALVKGTPDEVREKAKAFVEKIRGATEGGSHHHHHHHH |
| TMPRSS2                   | MALNSGSPPAIGPYENHGYQENPYPAQPTVVPTVYEVHPAQYYPSPVPQYAPRVLTAQSNPVVCTQPKSPSGTVCTSKTKKALCI<br>TLTLGTFVLGAALAGLLWKFMGSKCSNSGIECDSSGTCINPNSWCDGVSHCPGGEDENRCVRLYGNFIIQVYSSQRKSWHPVCQD<br>DWNENYGRAACRDMGYKNNFYSSQGI VDDSGSTSFMKLNLSAGNVDIYKLYHSDACSSKAVVSLRCIACGVNLSRQRSRIVGGES<br>ALPGANFWQVSLHVQNVHVCGGSIITPENIVTAAHCVEKPLNPNWHHTAFAGILRQSFMYGAGYQVEKVISHPNYSKTKNNDIAL<br>MKLQKPLTFNDLVKPVCLPNPMMQLQPEQLCWIISGWGATEEKGKTESEVLNAAKVLIIETQRCNSRYVDNLIPTAMICAGFLQGNVD<br>SCQDSSGGPLVTSKNNIWWLIGDTSWGSACAKAYRPGVYGNVMVFTDWIYRQMRADG                                                                                                                                                                                                                                                                                                                                                                                                                                                                                                                                                                                                                                                                                                                                                                                                                                                                                                                                                                                                                                                                                                                                               |
| HA-ferritin               | MKAKLLVLLCTFTATYADTICIGYHANNSTDTVDTVLEKNVTVTHSVNLLDHSNGKLCCLLKGIAPLQLGNCVAGWILGNPECELL<br>ISKESWSYIVETPNPENGTCYPGYFADYEELREQLSSVSSFERFEIFPKESSWPNHTVTVGSASCSSHNGKSSFYRNLWLTGKNGLY<br>PNLSKSYVNNKEKVLVWLVGWHHPNIGNQRALYHTENAYVSVVSHYSRRFTPEIAKRPKVRDQEGRINYWTLLPEPGDTIIFEAN<br>GNLIAFWYAFALSRGFGSGIIITSNAPMDECDKACQTPQGAINSLSLFPQNVHPVTIGECPKYVRSAKLRMVTGLRNIPORETRGLFGA<br>IAGFIEGGWTGMVDGWYGHQNEQGSYAADQKSTQNAINGITNKVNSVIEKMMTQFTAVGREFNKLERMENLNKKVDDGFLDIW<br>TYNAELLVLENERLDFHDSNVKNLYEKVKSQKLNNAKEIIGNCFEFYHCKNNECMESVKNGTYDYPKYSESKLNREKISGGDII<br>KLLNEQVKNEMQSSNLYMSMSWCYTHSLDAGLFLFDHAAEYEHAKKLIIFLNENNVPVQLTISISAPEHKFEGLTQIFQKAYEHE<br>QHTSESINNIVDHAIKSKDHATFNFLQWYVAEQHEEEVLPFKDILDKIELIGNENHGLYLDQVVKIAKRSKS                                                                                                                                                                                                                                                                                                                                                                                                                                                                                                                                                                                                                                                                                                                                                                                                                                                                                                                                              |
| NC99-NA                   | VTLAGNSSLCSISGWAIYTKDNSIRIGSKGDVVFVIREPFI SCSHLECRTFFLTQGALLNDKHSNGTKVDRSPYRALMSCLPEAPSP<br>YNSKFESVAWSASACHDGMWLTIGISGPDNGAVAVLYNGIITETIKSWKKRILRTQSESECVCVNGSCFTIMTDGPSNGAASYKIF<br>KIEKGVTKSIELNAPNFHYECCSYPDTGTVMCVCRDNWHGSRNPWVSFNQNLDYQIGLYICSGVFGDNPRPKDGEKSCNRPVTVDGA<br>DGVKGFYKYGNVWIGRTRKSNRLKGFEMIWDPNGWTDSDSFSVKQDVVAITDWSGYSGSVQHPQLTGLDCIRPCFWVWELVRLG<br>PRENTTIWTSGSSISFCGVNSDTANWSWPDGAELPFTIDK                                                                                                                                                                                                                                                                                                                                                                                                                                                                                                                                                                                                                                                                                                                                                                                                                                                                                                                                                                                                                                                                                                                                                                                                                                                        |
